# Supplementary material for: Investigating the putative unforeseen link between football fervour and colorectal cancer screening in Denmark
Source: PeerJ. 2024 Sep 26;12:e18057. doi: 10.7717/peerj.18057 (PMC11439399; doi:10.7717/peerj.18057)
Supplement: Supplemental Information 3 [file peerj-12-18057-s003.xlsx]

## Sheet: week 45
ANOVA results
Table Analyzed	Week 45
Data sets analyzed	A-I
ANOVA summary
F	70.61
P value	<0,0001
P value summary	****
Significant diff. among means (P < 0.05)?	Yes
R squared	0.9843
Brown-Forsythe test
F (DFn, DFd)	1,375e+029 (8, 9)
P value	<0,0001
P value summary	****
Are SDs significantly different (P < 0.05)?	Yes
Bartlett's test
Bartlett's statistic (corrected)
P value
P value summary
Are SDs significantly different (P < 0.05)?
ANOVA table	SS	DF	MS	F (DFn, DFd)	P value
Treatment (between columns)	528.4	8	66.06	F (8, 9) = 70,61	P<0,0001
Residual (within columns)	8.42	9	0.9356
Total	536.9	17
Data summary
Number of treatments (columns)	9
Number of values (total)	18
Multiple comparisons
Number of families	1
Number of comparisons per family	8
Alpha	0.05
Šídák's multiple comparisons test	Mean Diff,	95,00% CI of diff,	Below threshold?	Summary	Adjusted P Value	I-?
2022 vs. 2014	-20.8	-24,22 to -17,38	Yes	****	<0,0001	A	2014
2022 vs. 2015	-16.95	-20,37 to -13,53	Yes	****	<0,0001	B	2015
2022 vs. 2016	-15	-18,42 to -11,58	Yes	****	<0,0001	C	2016
2022 vs. 2017	-12.7	-16,12 to -9,283	Yes	****	<0,0001	D	2017
2022 vs. 2018	-10.75	-14,17 to -7,333	Yes	****	<0,0001	E	2018
2022 vs. 2019	-14.75	-18,17 to -11,33	Yes	****	<0,0001	F	2019
2022 vs. 2020	-11.95	-15,37 to -8,533	Yes	****	<0,0001	G	2020
2022 vs. 2021	-10.35	-13,77 to -6,933	Yes	****	<0,0001	H	2021
Test details	Mean 1	Mean 2	Mean Diff,	SE of diff,	n1	n2	t	DF
2022 vs. 2014	40.65	61.45	-20.8	0.9672	2	2	21.5	9
2022 vs. 2015	40.65	57.6	-16.95	0.9672	2	2	17.52	9
2022 vs. 2016	40.65	55.65	-15	0.9672	2	2	15.51	9
2022 vs. 2017	40.65	53.35	-12.7	0.9672	2	2	13.13	9
2022 vs. 2018	40.65	51.4	-10.75	0.9672	2	2	11.11	9
2022 vs. 2019	40.65	55.4	-14.75	0.9672	2	2	15.25	9
2022 vs. 2020	40.65	52.6	-11.95	0.9672	2	2	12.35	9
2022 vs. 2021	40.65	51	-10.35	0.9672	2	2	10.7	9

## Sheet: week 44
ANOVA results
Table Analyzed	Week 44
Data sets analyzed	A-I
ANOVA summary
F	143.4
P value	<0,0001
P value summary	****
Significant diff. among means (P < 0.05)?	Yes
R squared	0.9922
Brown-Forsythe test
F (DFn, DFd)	5,787e+028 (8, 9)
P value	<0,0001
P value summary	****
Are SDs significantly different (P < 0.05)?	Yes
Bartlett's test
Bartlett's statistic (corrected)
P value
P value summary
Are SDs significantly different (P < 0.05)?
ANOVA table	SS	DF	MS	F (DFn, DFd)	P value
Treatment (between columns)	1342	8	167.8	F (8, 9) = 143,4	P<0,0001
Residual (within columns)	10.53	9	1.17
Total	1353	17
Data summary
Number of treatments (columns)	9
Number of values (total)	18
Multiple comparisons
Number of families	1
Number of comparisons per family	8
Alpha	0.05
Šídák's multiple comparisons test	Mean Diff,	95,00% CI of diff,	Below threshold?	Summary	Adjusted P Value	I-?
2022 vs. 2014	-27.15	-30,97 to -23,33	Yes	****	<0,0001	A	2014
2022 vs. 2015	-25.1	-28,92 to -21,28	Yes	****	<0,0001	B	2015
2022 vs. 2016	-23.85	-27,67 to -20,03	Yes	****	<0,0001	C	2016
2022 vs. 2017	-17.45	-21,27 to -13,63	Yes	****	<0,0001	D	2017
2022 vs. 2018	-25.65	-29,47 to -21,83	Yes	****	<0,0001	E	2018
2022 vs. 2019	-9.3	-13,12 to -5,479	Yes	****	<0,0001	F	2019
2022 vs. 2020	-24.35	-28,17 to -20,53	Yes	****	<0,0001	G	2020
2022 vs. 2021	-23.05	-26,87 to -19,23	Yes	****	<0,0001	H	2021
Test details	Mean 1	Mean 2	Mean Diff,	SE of diff,	n1	n2	t	DF
2022 vs. 2014	33.7	60.85	-27.15	1.082	2	2	25.1	9
2022 vs. 2015	33.7	58.8	-25.1	1.082	2	2	23.2	9
2022 vs. 2016	33.7	57.55	-23.85	1.082	2	2	22.05	9
2022 vs. 2017	33.7	51.15	-17.45	1.082	2	2	16.13	9
2022 vs. 2018	33.7	59.35	-25.65	1.082	2	2	23.71	9
2022 vs. 2019	33.7	43	-9.3	1.082	2	2	8.598	9
2022 vs. 2020	33.7	58.05	-24.35	1.082	2	2	22.51	9
2022 vs. 2021	33.7	56.75	-23.05	1.082	2	2	21.31	9
