# Supplementary material for: Investigating the putative unforeseen link between football fervour and colorectal cancer screening in Denmark
Source: PeerJ. 2024 Sep 26;12:e18057. doi: 10.7717/peerj.18057 (PMC11439399; doi:10.7717/peerj.18057)
Supplement: Supplemental Information 4 [file peerj-12-18057-s004.xlsx]

## Sheet: rådata
	uge	år	Uegnet	Positivt	Negativt	Intet svar	Svarprocent		uge	år	Uegnet	Positivt	Negativt	Intet svar	Svarprocent				Uegnet	Positivt	Negativt	Intet svar	Svarprocent			År	Uegnet	Positivt	Negativt	Intet svar	Svarprocent
									1	2014	4	88	1039	669	0.628333		1	2016	3	103	1324	901	0.613471		1	2017	4	122	1421	1090	0.586651		1	2018	7	145	3466	2734	0.569584										1
									2	2015	4	102	1247	730	0.649544		2	2016	4	107	1334	916	0.612029		2	2017	11	92	1408	1127	0.572782		2	2018	0	2	28	10	0.75		2	2019	5	74	1764	1387	0.570588		2
									3	2015	4	85	1052	651	0.636719		3	2016	2	98	1290	944	0.595544		3	2017	4	152	1474	1236	0.568737		3	2018	7	79	1614	2360	0.418719		3	2019	4	72	1150	1082	0.531196		3
									4	2015	5	101	979	690	0.611268		4	2016	5	84	1326	919	0.606255		4	2017	7	120	1425	1089	0.587656		4	2018	3	73	1477	1762	0.468477		4	2019	3	99	2490	1495	0.634206		4
									5	2015	3	85	1011	660	0.624787		5	2016	4	94	1355	861	0.627917		5	2017	9	103	1476	1078	0.595649		5	2018	9	111	1917	1405	0.591807		5	2019	5	111	2399	1724	0.5933		5
									6	2015	4	76	1059	651	0.636313		6	2016	4	88	1349	900	0.615549		6	2017	6	96	1450	1075	0.590788		6	2018	7	96	1599	1098	0.607857		6	2019	7	112	2426	1730	0.595322		6
									7	2015	1	82	986	718	0.598209		7	2016	5	88	1326	805	0.63804		7	2017	10	116	1416	1137	0.575588		7	2018	1	92	1396	1269	0.539884		7	2019	10	101	2574	1604	0.62602		7
									8	2015	2	109	1053	661	0.637808		8	2016	2	98	1278	861	0.615453		8	2017	4	99	1465	1092	0.589474		8	2018	3	103	1808	851	0.692224		8	2019	3	108	2045	2220	0.492687		8
									9	2015	2	26	217	162	0.601966		9	2016	2	116	1421	1017	0.602113		9	2017	6	66	1391	1034	0.585903		9	2018	3	78	1419	1295	0.536673		9	2019	12	100	2158	2020	0.529138		9
	10	2014	0	10	61	28	0.717172		10	2015	0	19	219	161	0.596491		10	2016	2	89	1140	784	0.610918		10	2017	4	112	1319	1091	0.568092		10	2018	4	144	2389	1929	0.56807		10	2019	4	121	2406	1641	0.606663		10
	11	2014	1	46	908	719	0.57049		11	2015	0	13	228	168	0.589242		11	2016	1	5	122	130	0.496124		11	2017	4	20	432	389	0.539645		11	2018	4	135	2295	1602	0.603072		11	2019	3	113	2228	1700	0.579624		11
	12	2014	1	119	1018	503	0.69348		12	2015	2	59	1006	753	0.586264		12	2016	0	10	128	107	0.563265		12	2017	5	51	845	630	0.588504		12	2018	5	120	2343	1546	0.614848		12	2019	5	109	1809	1282	0.6		12
	13	2014	3	113	997	511	0.685345		13	2015	1	114	1215	765	0.634845		13	2016	3	87	1233	967	0.577729		13	2017	5	104	1369	1092	0.575097		13	2018	4	89	1585	1870	0.472943		13	2019	3	96	1742	1267	0.592342		13
	14	2014	3	129	838	652	0.598027		14	2015	2	80	1018	678	0.618673		14	2016	3	92	1336	895	0.615219		14	2017	6	111	1329	1108	0.566171		14	2018	4	102	1893	1636	0.549931		14	2019	7	95	1862	1657	0.542392		14
	15	2014	0	34	501	426	0.556712		15	2015	1	82	1022	658	0.626773		15	2016	0	101	1286	925	0.599913		15	2017	7	94	1335	1120	0.561815		15	2018	8	111	2153	1451	0.610261		15	2019	13	122	1955	1073	0.660765		15
	16	2014	0	27	538	392	0.590387		16	2015	2	81	988	688	0.608869		16	2016	8	110	1280	936	0.598972		16	2017	3	97	1332	1133	0.558285		16	2018	7	109	2165	1447	0.611856		16	2019	2	85	1882	1175	0.626272		16
	17	2014	2	28	503	402	0.570053		17	2015	3	95	1211	806	0.618913		17	2016	3	86	1289	937	0.595248		17	2017	5	121	1345	1085	0.575509		17	2018	6	119	2213	1292	0.644077		17	2019	3	81	1465	1524	0.504068		17
	18	2014	1	47	841	696	0.560883		18	2015	3	97	1097	694	0.632998		18	2016	6	99	1215	965	0.577681		18	2017	10	105	1377	1066	0.583268		18	2018	5	80	1705	1892	0.486149		18	2019	4	73	1436	1483	0.505007		18
	19	2014	0	3	66	65	0.514925		19	2015	3	94	1094	700	0.629825		19	2016	9	97	1248	947	0.58844		19	2017	7	87	1365	1088	0.572831		19	2018	4	109	1870	1681	0.541212		19	2019	4	74	1608	1249	0.574446		19
	20	2014	0	15	147	150	0.519231		20	2015	1	83	1087	709	0.622872		20	2016	4	105	1367	1015	0.592533		20	2017	4	129	1360	1106	0.574452		20	2018	7	109	1937	1616	0.559553		20	2019	4	84	1493	1409	0.528763		20
	21	2014	1	48	630	490	0.580838		21	2015	3	84	1007	675	0.618428		21	2016	5	120	1348	1014	0.59228		21	2017	6	115	1398	1035	0.594753		21	2018	5	118	1954	1555	0.571861		21	2019	4	64	1652	1300	0.569536		21
	22	2014	1	33	527	401	0.58316		22	2015	2	33	386	261	0.617302		22	2016	11	86	1040	774	0.594976		22	2017	2	111	1376	1090	0.577356		22	2018	5	103	1964	1604	0.563656		22	2019	5	69	1534	1289	0.555057		22
	23	2014	0	28	262	187	0.607966		23	2015	0	21	361	303	0.557664		23	2016	2	43	619	455	0.593387		23	2017	8	65	834	724	0.556101		23	2018	1	63	1330	1122	0.554054		23	2019	4	72	1346	993	0.58882		23
	24	2014	0	21	228	153	0.619403		24	2015	1	26	305	245	0.57539		24	2016	6	39	583	448	0.583643		24	2017	2	46	524	417	0.578362		24	2018	1	41	956	726	0.578886		24	2019	7	69	1540	906	0.640761		24
	25	2014	2	14	202	126	0.633721		25	2015	1	10	115	90	0.583333		25	2016	3	40	558	458	0.567517		25	2017	3	42	511	399	0.582199		25	2018	3	62	1351	875	0.618071		25	2019	6	42	1015	803	0.569668		25
	26	2014	1	0	14	9	0.625		26	2015	1	18	312	240	0.579685		26	2016	3	45	559	452	0.573182		26	2017	2	43	501	367	0.598028		26	2018	2	80	1505	910	0.635563		26	2019	4	65	1208	646	0.664067		26
	27	2014	0	0	25	11	0.694444		27	2015	0	35	330	210	0.634783		27	2016	5	71	898	715	0.576673		27	2017	1	41	489	392	0.575298		27	2018	4	80	1164	688	0.644628		27	2019	6	57	1107	801	0.593607		27
	28	2014	0	2	17	10	0.655172		28	2015	2	45	634	428	0.614067		28	2016	7	68	824	772	0.538001		28	2017	6	104	1237	928	0.592088		28	2018	4	63	1084	995	0.536347		28	2019	8	58	1220	726	0.639165		28
	29	2014	3	22	278	224	0.574953		29	2015	1	75	1005	721	0.599889		29	2016	4	120	1191	931	0.585485		29	2017	4	107	1286	979	0.587963		29	2018	8	99	1635	1834	0.487136		29	2019	10	80	1760	1480	0.555556		29
	30	2014	2	31	384	311	0.572802		30	2015	3	89	1026	722	0.607609		30	2016	5	94	1176	943	0.574842		30	2017	8	122	1321	1031	0.584609		30	2018	6	111	1972	1669	0.555881		30	2019	4	98	2187	1732	0.569261		30
	31	2014	1	39	492	391	0.576381		31	2015	1	75	1034	734	0.601952		31	2016	13	94	1208	1029	0.561007		31	2017	3	101	1309	1032	0.577914		31	2018	6	118	2223	1553	0.601795		31	2019	5	107	2331	1708	0.588533		31
	32	2014	2	36	524	392	0.589099		32	2015	0	80	1044	704	0.61488		32	2016	4	89	1198	1085	0.54335		32	2017	2	94	1283	1042	0.569599		32	2018	6	110	2209	1420	0.620828		32	2019	7	125	2092	1583	0.584187		32
	33	2014	3	31	538	385	0.597701		33	2015	1	78	1074	684	0.627654		33	2016	4	86	1199	1042	0.552982		33	2017	2	101	1338	1031	0.582929		33	2018	7	126	2275	1558	0.607161		33	2019	5	109	2059	1717	0.558612		33
	34	2014	2	50	864	620	0.596354		34	2015	3	89	1022	716	0.608743		34	2016	8	95	1217	1002	0.568475		34	2017	8	101	1285	1075	0.564601		34	2018	3	112	2138	1609	0.583376		34	2019	5	109	2014	1662	0.561478		34
	35	2014	9	54	902	585	0.622581		35	2015	0	64	1035	722	0.603515		35	2016	3	101	1197	1034	0.557173		35	2017	6	123	1380	1138	0.570079		35	2018	6	114	2228	1483	0.612895		35	2019	4	103	1687	1222	0.594828		35
	36	2014	2	79	1195	782	0.620019		36	2015	0	77	1042	689	0.618916		36	2016	4	117	1299	1087	0.566414		36	2017	3	118	1456	1172	0.573663		36	2018	5	98	2080	1670	0.566572		36	2019	7	165	2101	1337	0.62964		36
	37	2014	5	89	1191	779	0.622578		37	2015	1	100	1027	690	0.620462		37	2016	8	124	1310	1068	0.574502		37	2017	8	125	1423	1138	0.57758		37	2018	4	114	2139	1626	0.581252		37	2019	11	128	2486	1339	0.66221		37
	38	2014	7	119	1574	1021	0.62477		38	2015	2	86	1013	713	0.606946		38	2016	8	135	1580	1331	0.564178		38	2017	6	113	1447	1141	0.5785		38	2018	3	116	1888	1612	0.554573		38	2019	8	54	1126	852	0.582353		38
	39	2014	11	153	1629	984	0.645661		39	2015	3	90	1223	833	0.612378		39	2016	5	116	1395	1035	0.594277		39	2017	3	66	773	629	0.5724		39	2018	2	100	2069	1490	0.593007		39	2019	4	96	1804	996	0.656552		39
	40	2014	16	108	1352	890	0.623838		40	2015	1	84	1189	858	0.597561		40	2016	6	97	1365	1087	0.57456		40	2017	5	53	787	647	0.566354		40	2018	2	100	2303	1216	0.664181		40	2019	9	59	1278	1591	0.458291		40
	41	2014	4	133	1828	1203	0.620265		41	2015	4	97	1199	834	0.609185		41	2016	14	101	1305	1093	0.565062		41	2017	5	53	764	678	0.548		41	2018	0	101	2011	1515	0.582299		41	2019	6	47	981	1140	0.475621		41
	42	2014	0	21	182	146	0.581662										42	2016	6	107	1310	1081	0.568291		42	2017	1	59	770	675	0.551495		42	2018	2	89	1775	1743	0.517041		42	2019	7	85	1283	1251	0.52361		42
	43	2014	4	32	542	352	0.621505		43	2015	4	168	2190	1514	0.609391		43	2016	7	90	1274	1030	0.571012		43	2017	0	7	113	89	0.574163		43	2018	1	91	1932	1684	0.545847		43	2019	2	60	1128	1618	0.423789		43
	44	2014	1	81	1088	741	0.612245		44	2015	9	88	1060	797	0.592119		44	2016	13	96	1279	1014	0.577852		44	2017	0	27	414	397	0.526253		44	2018	4	79	1404	999	0.59815		44	2019	4	51	1091	1464	0.43908		44
	45	2014	5	86	1089	737	0.615545		45	2015	5	75	1031	812	0.577743		45	2016	9	91	1238	1047	0.561006		45	2017	2	54	570	526	0.543403		45	2018	4	103	1798	1760	0.519782		45	2019	6	41	700	563	0.570229		45
	46	2014	5	69	778	537	0.613391		46	2015	0	21	160	113	0.615646		46	2016	2	40	504	498	0.522989		46	2017	0	28	546	431	0.571144		46	2018	4	103	1619	1286	0.573041		46	2019	2	48	739	495	0.614486		46
	47	2014	3	13	140	97	0.616601		47	2015	0	16	130	100	0.593496		47	2016	4	39	546	426	0.580296		47	2017	0	24	295	228	0.583181		47	2018	0	15	387	223	0.6432		47	2019	0	35	613	387	0.626087		47
	48	2014	0	9	147	101	0.607004		48	2015	2	14	149	89	0.649606		48	2016	2	52	541	435	0.57767		48	2017	0	11	189	180	0.526316		48	2018	4	67	1097	777	0.600514		48	2019	4	9	234	195	0.558824		48
	49	2014	1	23	294	223	0.5878		49	2015	3	63	1020	848	0.561531		49	2016	8	121	1639	1342	0.568489		49	2017	0	10	134	127	0.531365		49	2018	1	16	310	222	0.595628		49	2019	2	13	246	225	0.537037		49
	50	2014	3	47	747	535	0.598348		50	2015	9	89	1049	781	0.594917		50	2016	11	139	1631	1343	0.570102		50	2017	0	1	49	52	0.490196		50	2018	4	80	1756	1510	0.549254		50	2019	1	10	225	266	0.47012		50
	51	2014	2	58	799	497	0.633481		51	2015	7	84	1035	765	0.595452		51	2016	17	113	1647	1413	0.557053		51	2017	0	11	164	700	0.2		51	2018	2	16	384	327	0.55144		51	2019	4	16	417	461	0.486637		51
	52	2014	1	53	802	484	0.638806		52	2015	6	86	1099	733	0.619023		52	2016	12	127	1770	1415	0.574308		52	2017	5	161	2107	2105	0.519187		52	2018	6	25	373	289	0.582973		52	2019	9	59	1257	1310	0.502846		52
									53	2015	7	99	1055	743	0.609769																																		53
[truncated: 83 more columns]

## Sheet: svar% deltagelse%
	Week	Year	No Usable	Positive	Negative	No Response	Invited	Returned	% positive	% returned		Week	Year	No Usable	Positive	Negative	No Response	Invited	Returned	% positive	% returned		Week	Year	No Usable	Positive	Negative	No Response	Invited	Returned	% positive	% returned		Week	Year	No Usable	Positive	Negative	No Response	Invited	Returned	% positive	% returned		Week	Year	No Usable	Positive	Negative
tekniske problemer	1											1	2014	4	88	1039	669	1800	1131	7.78073	62.8333		1	2016	3	103	1324	901	2331	1430	7.2028	61.3471		1	2017	4	122	1421	1090	2637	1547	7.88623	58.6651		1	2018	7	145	3466
ingen data	2											2	2015	4	102	1247	730	2083	1353	7.5388	64.9544		2	2016	4	107	1334	916	2361	1445	7.40484	61.2029		2	2017	11	92	1408	1127	2638	1511	6.08868	57.2782		2	2018	0	2	28
meget få invitationer	3											3	2015	4	85	1052	651	1792	1141	7.44961	63.6719		3	2016	2	98	1290	944	2334	1390	7.05036	59.5544		3	2017	4	152	1474	1236	2866	1630	9.32515	56.8737		3	2018	7	79	1614
observationstid til dd	4											4	2015	5	101	979	690	1775	1085	9.30876	61.1268		4	2016	5	84	1326	919	2334	1415	5.9364	60.6255		4	2017	7	120	1425	1089	2641	1552	7.73196	58.7656		4	2018	3	73	1477
observationstid 6 uger	5											5	2015	3	85	1011	660	1759	1099	7.7343	62.4787		5	2016	4	94	1355	861	2314	1453	6.46937	62.7917		5	2017	9	103	1476	1078	2666	1588	6.48615	59.5649		5	2018	9	111	1917
	6											6	2015	4	76	1059	651	1790	1139	6.67252	63.6313		6	2016	4	88	1349	900	2341	1441	6.10687	61.5549		6	2017	6	96	1450	1075	2627	1552	6.18557	59.0788		6	2018	7	96	1599
	7											7	2015	1	82	986	718	1787	1069	7.67072	59.8209		7	2016	5	88	1326	805	2224	1419	6.20155	63.804		7	2017	10	116	1416	1137	2679	1542	7.5227	57.5588		7	2018	1	92	1396
	8											8	2015	2	109	1053	661	1825	1164	9.36426	63.7808		8	2016	2	98	1278	861	2239	1378	7.11176	61.5453		8	2017	4	99	1465	1092	2660	1568	6.31378	58.9474		8	2018	3	103	1808
	9											9	2015	2	26	217	162	407	245	10.6122	60.1966		9	2016	2	116	1421	1017	2556	1539	7.53736	60.2113		9	2017	6	66	1391	1034	2497	1463	4.51128	58.5903		9	2018	3	78	1419
	10	2014	0	10	61	28	99	71	14.0845	71.7172		10	2015	0	19	219	161	399	238	7.98319	59.6491		10	2016	2	89	1140	784	2015	1231	7.22989	61.0918		10	2017	4	112	1319	1091	2526	1435	7.80488	56.8092		10	2018	4	144	2389
	11	2014	1	46	908	719	1674	955	4.81675	57.049		11	2015	0	13	228	168	409	241	5.39419	58.9242		11	2016	1	5	122	130	258	128	3.90625	49.6124		11	2017	4	20	432	389	845	456	4.38596	53.9645		11	2018	4	135	2295
	12	2014	1	119	1018	503	1641	1138	10.4569	69.348		12	2015	2	59	1006	753	1820	1067	5.52952	58.6264		12	2016	0	10	128	107	245	138	7.24638	56.3265		12	2017	5	51	845	630	1531	901	5.66038	58.8504		12	2018	5	120	2343
	13	2014	3	113	997	511	1624	1113	10.1527	68.5345		13	2015	1	114	1215	765	2095	1330	8.57143	63.4845		13	2016	3	87	1233	967	2290	1323	6.57596	57.7729		13	2017	5	104	1369	1092	2570	1478	7.03654	57.5097		13	2018	4	89	1585
	14	2014	3	129	838	652	1622	970	13.299	59.8027		14	2015	2	80	1018	678	1778	1100	7.27273	61.8673		14	2016	3	92	1336	895	2326	1431	6.42907	61.5219		14	2017	6	111	1329	1108	2554	1446	7.67635	56.6171		14	2018	4	102	1893
	15	2014	0	34	501	426	961	535	6.35514	55.6712		15	2015	1	82	1022	658	1763	1105	7.42081	62.6773		15	2016	0	101	1286	925	2312	1387	7.2819	59.9913		15	2017	7	94	1335	1120	2556	1436	6.54596	56.1815		15	2018	8	111	2153
	16	2014	0	27	538	392	957	565	4.77876	59.0387		16	2015	2	81	988	688	1759	1071	7.56303	60.8869		16	2016	8	110	1280	936	2334	1398	7.86838	59.8972		16	2017	3	97	1332	1133	2565	1432	6.77374	55.8285		16	2018	7	109	2165
	17	2014	2	28	503	402	935	533	5.25328	57.0053		17	2015	3	95	1211	806	2115	1309	7.25745	61.8913		17	2016	3	86	1289	937	2315	1378	6.24093	59.5248		17	2017	5	121	1345	1085	2556	1471	8.2257	57.5509		17	2018	6	119	2213
	18	2014	1	47	841	696	1585	889	5.28684	56.0883		18	2015	3	97	1097	694	1891	1197	8.10359	63.2998		18	2016	6	99	1215	965	2285	1320	7.5	57.7681		18	2017	10	105	1377	1066	2558	1492	7.03753	58.3268		18	2018	5	80	1705
	19	2014	0	3	66	65	134	69	4.34783	51.4925		19	2015	3	94	1094	700	1891	1191	7.89253	62.9825		19	2016	9	97	1248	947	2301	1354	7.16396	58.844		19	2017	7	87	1365	1088	2547	1459	5.96299	57.2831		19	2018	4	109	1870
	20	2014	0	15	147	150	312	162	9.25926	51.9231		20	2015	1	83	1087	709	1880	1171	7.08796	62.2872		20	2016	4	105	1367	1015	2491	1476	7.11382	59.2533		20	2017	4	129	1360	1106	2599	1493	8.64032	57.4452		20	2018	7	109	1937
	21	2014	1	48	630	490	1169	679	7.06922	58.0838		21	2015	3	84	1007	675	1769	1094	7.67824	61.8428		21	2016	5	120	1348	1014	2487	1473	8.14664	59.228		21	2017	6	115	1398	1035	2554	1519	7.57077	59.4753		21	2018	5	118	1954
	22	2014	1	33	527	401	962	561	5.88235	58.316		22	2015	2	33	386	261	682	421	7.83848	61.7302		22	2016	11	86	1040	774	1911	1137	7.56376	59.4976		22	2017	2	111	1376	1090	2579	1489	7.45467	57.7356		22	2018	5	103	1964
	23	2014	0	28	262	187	477	290	9.65517	60.7966		23	2015	0	21	361	303	685	382	5.49738	55.7664		23	2016	2	43	619	455	1119	664	6.4759	59.3387		23	2017	8	65	834	724	1631	907	7.16648	55.6101		23	2018	1	63	1330
	24	2014	0	21	228	153	402	249	8.43373	61.9403		24	2015	1	26	305	245	577	332	7.83133	57.539		24	2016	6	39	583	448	1076	628	6.21019	58.3643		24	2017	2	46	524	417	989	572	8.04196	57.8362		24	2018	1	41	956
	25	2014	2	14	202	126	344	218	6.42202	63.3721		25	2015	1	10	115	90	216	126	7.93651	58.3333		25	2016	3	40	558	458	1059	601	6.65557	56.7517		25	2017	3	42	511	399	955	556	7.55396	58.2199		25	2018	3	62	1351
	26	2014	1	0	14	9	24	15	0	62.5		26	2015	1	18	312	240	571	331	5.43807	57.9685		26	2016	3	45	559	452	1059	607	7.41351	57.3182		26	2017	2	43	501	367	913	546	7.87546	59.8028		26	2018	2	80	1505
	27	2014	0	0	25	11	36	25	0	69.4444		27	2015	0	35	330	210	575	365	9.58904	63.4783		27	2016	5	71	898	715	1689	974	7.28953	57.6673		27	2017	1	41	489	392	923	531	7.72128	57.5298		27	2018	4	80	1164
	28	2014	0	2	17	10	29	19	10.5263	65.5172		28	2015	2	45	634	428	1109	681	6.60793	61.4067		28	2016	7	68	824	772	1671	899	7.56396	53.8001		28	2017	6	104	1237	928	2275	1347	7.72086	59.2088		28	2018	4	63	1084
	29	2014	3	22	278	224	527	303	7.26073	57.4953		29	2015	1	75	1005	721	1802	1081	6.93802	59.9889		29	2016	4	120	1191	931	2246	1315	9.12548	58.5485		29	2017	4	107	1286	979	2376	1397	7.65927	58.7963		29	2018	8	99	1635
	30	2014	2	31	384	311	728	417	7.43405	57.2802		30	2015	3	89	1026	722	1840	1118	7.96064	60.7609		30	2016	5	94	1176	943	2218	1275	7.37255	57.4842		30	2017	8	122	1321	1031	2482	1451	8.40799	58.4609		30	2018	6	111	1972
	31	2014	1	39	492	391	923	532	7.33083	57.6381		31	2015	1	75	1034	734	1844	1110	6.75676	60.1952		31	2016	13	94	1208	1029	2344	1315	7.14829	56.1007		31	2017	3	101	1309	1032	2445	1413	7.14791	57.7914		31	2018	6	118	2223
	32	2014	2	36	524	392	954	562	6.40569	58.9099		32	2015	0	80	1044	704	1828	1124	7.11744	61.488		32	2016	4	89	1198	1085	2376	1291	6.89388	54.335		32	2017	2	94	1283	1042	2421	1379	6.81653	56.9599		32	2018	6	110	2209
	33	2014	3	31	538	385	957	572	5.41958	59.7701		33	2015	1	78	1074	684	1837	1153	6.76496	62.7654		33	2016	4	86	1199	1042	2331	1289	6.67184	55.2982		33	2017	2	101	1338	1031	2472	1441	7.00902	58.2929		33	2018	7	126	2275
	34	2014	2	50	864	620	1536	916	5.45852	59.6354		34	2015	3	89	1022	716	1830	1114	7.98923	60.8743		34	2016	8	95	1217	1002	2322	1320	7.19697	56.8475		34	2017	8	101	1285	1075	2469	1394	7.24534	56.4601		34	2018	3	112	2138
	35	2014	9	54	902	585	1550	965	5.59585	62.2581		35	2015	0	64	1035	722	1821	1099	5.82348	60.3515		35	2016	3	101	1197	1034	2335	1301	7.76326	55.7173		35	2017	6	123	1380	1138	2647	1509	8.15109	57.0079		35	2018	6	114	2228
	36	2014	2	79	1195	782	2058	1276	6.19122	62.0019		36	2015	0	77	1042	689	1808	1119	6.88114	61.8916		36	2016	4	117	1299	1087	2507	1420	8.23944	56.6414		36	2017	3	118	1456	1172	2749	1577	7.48256	57.3663		36	2018	5	98	2080
	37	2014	5	89	1191	779	2064	1285	6.92607	62.2578		37	2015	1	100	1027	690	1818	1128	8.86525	62.0462		37	2016	8	124	1310	1068	2510	1442	8.59917	57.4502		37	2017	8	125	1423	1138	2694	1556	8.03342	57.758		37	2018	4	114	2139
	38	2014	7	119	1574	1021	2721	1700	7	62.477		38	2015	2	86	1013	713	1814	1101	7.81108	60.6946		38	2016	8	135	1580	1331	3054	1723	7.83517	56.4178		38	2017	6	113	1447	1141	2707	1566	7.21584	57.85		38	2018	3	116	1888
	39	2014	11	153	1629	984	2777	1793	8.53318	64.5661		39	2015	3	90	1223	833	2149	1316	6.83891	61.2378		39	2016	5	116	1395	1035	2551	1516	7.65172	59.4277		39	2017	3	66	773	629	1471	842	7.83848	57.24		39	2018	2	100	2069
	40	2014	16	108	1352	890	2366	1476	7.31707	62.3838		40	2015	1	84	1189	858	2132	1274	6.59341	59.7561		40	2016	6	97	1365	1087	2555	1468	6.60763	57.456		40	2017	5	53	787	647	1492	845	6.27219	56.6354		40	2018	2	100	2303
	41	2014	4	133	1828	1203	3168	1965	6.76845	62.0265		41	2015	4	97	1199	834	2134	1300	7.46154	60.9185		41	2016	14	101	1305	1093	2513	1420	7.11268	56.5062		41	2017	5	53	764	678	1500	822	6.44769	54.8		41	2018	0	101	2011
	42	2014	0	21	182	146	349	203	10.3448	58.1662													42	2016	6	107	1310	1081	2504	1423	7.51933	56.8291		42	2017	1	59	770	675	1505	830	7.10843	55.1495		42	2018	2	89	1775
	43	2014	4	32	542	352	930	578	5.53633	62.1505		43	2015	4	168	2190	1514	3876	2362	7.11262	60.9391		43	2016	7	90	1274	1030	2401	1371	6.56455	57.1012		43	2017	0	7	113	89	209	120	5.83333	57.4163		43	2018	1	91	1932
	44	2014	1	81	1088	741	1911	1170	6.92308	61.2245		44	2015	9	88	1060	797	1954	1157	7.60588	59.2119		44	2016	13	96	1279	1014	2402	1388	6.91643	57.7852		44	2017	0	27	414	397	838	441	6.12245	52.6253		44	2018	4	79	1404
	45	2014	5	86	1089	737	1917	1180	7.28814	61.5545		45	2015	5	75	1031	812	1923	1111	6.75068	57.7743		45	2016	9	91	1238	1047	2385	1338	6.8012	56.1006		45	2017	2	54	570	526	1152	626	8.6262	54.3403		45	2018	4	103	1798
	46	2014	5	69	778	537	1389	852	8.09859	61.3391		46	2015	0	21	160	113	294	181	11.6022	61.5646		46	2016	2	40	504	498	1044	546	7.32601	52.2989		46	2017	0	28	546	431	1005	574	4.87805	57.1144		46	2018	4	103	1619
	47	2014	3	13	140	97	253	156	8.33333	61.6601		47	2015	0	16	130	100	246	146	10.9589	59.3496		47	2016	4	39	546	426	1015	589	6.62139	58.0296		47	2017	0	24	295	228	547	319	7.52351	58.3181		47	2018	0	15	387
	48	2014	0	9	147	101	257	156	5.76923	60.7004		48	2015	2	14	149	89	254	165	8.48485	64.9606		48	2016	2	52	541	435	1030	595	8.7395	57.767		48	2017	0	11	189	180	380	200	5.5	52.6316		48	2018	4	67	1097
	49	2014	1	23	294	223	541	318	7.2327	58.78		49	2015	3	63	1020	848	1934	1086	5.8011	56.1531		49	2016	8	121	1639	1342	3110	1768	6.84389	56.8489		49	2017	0	10	134	127	271	144	6.94444	53.1365		49	2018	1	16	310
	50	2014	3	47	747	535	1332	797	5.89711	59.8348		50	2015	9	89	1049	781	1928	1147	7.75937	59.4917		50	2016	11	139	1631	1343	3124	1781	7.8046	57.0102		50	2017	0	1	49	52	102	50	2	49.0196		50	2018	4	80	1756
	51	2014	2	58	799	497	1356	859	6.75204	63.3481		51	2015	7	84	1035	765	1891	1126	7.46004	59.5452		51	2016	17	113	1647	1413	3190	1777	6.35903	55.7053		51	2017	0	11	164	700	875	175	6.28571	20		51	2018	2	16	384
	52	2014	1	53	802	484	1340	856	6.19159	63.8806		52	2015	6	86	1099	733	1924	1191	7.22082	61.9023		52	2016	12	127	1770	1415	3324	1909	6.6527	57.4308		52	2017	5	161	2107	2105	4378	2273	7.08315	51.9187		52	2018	6	25	373
												53	2015	7	99	1055	743	1904	1161	8.52713	60.9769
		n	108	2153	27682	18948	48891	29943	7.19033	61.2444				129	3730	46189	31739	81787	50048	7.45285	61.1931				289	4653	60095	46631	111668	65037	7.15439	58.2414				222	4234	54407	44461	103324	58863	7.19297	56.9693				213	4719	88585
[truncated: 135 more columns]

## Sheet: inviterede pr uge 2014-22
	uge	2014	2015	2016	2017	2018	2019	2020	2021	2022
	1	0	1769	2311	2603	3179	3068	2383	3580	2782
	2	0	2059	2301	2593	7	3142	2854	3194	2824
	3	0	1734	2281	2791	4041	2180	2740	1748	2233
	4	0	1741	2256	2536	3240	4002	3650	2529	2475
	5	0	1737	2251	2563	3403	4166	3507	2438	2810
	6	0	1740	2263	2562	2731	4199	3154	3353	2902
	7	0	1736	2191	2559	2720	4193	3525	3209	2956
	8	0	1761	2209	2566	2714	4331	3480	3213	2932
	9	0	358	2522	2385	2726	4209	3504	2590	2916
	10	102	343	1959	2479	4436	4066	3523	2319	2956
	11	1664	342	188	738	3992	3970	3480	2263	2351
	12	1634	1772	180	1451	3988	3088	1947	2419	2227
	13	1614	2050	2242	2472	3308	2996	1718	2618	2919
	14	1614	1729	2266	2469	3554	3505	252	3256	2744
	15	915	1751	2240	2498	3598	2994	424	3120	2744
	16	934	1740	2276	2529	3563	3009	2635	2667	2999
	17	915	2100	2256	2497	3530	2982	3647	2087	3296
	18	1549	1854	2240	2441	3563	2849	3337	2960	3359
	19	82	1859	2251	2479	3532	2804	3070	3222	3444
	20	257	1850	2446	2539	3511	2857	3000	3003	3402
	21	1136	1720	2461	2466	3501	2925	3227	3270	3242
	22	903	621	1840	2527	3552	2791	3000	2597	2429
	23	446	653	1035	1532	2369	2305	2581	2136	2430
	24	376	547	1014	949	1603	2463	2480	1834	2392
	25	323	173	999	885	2128	1805	1921	1733	2314
	26	0	541	1007	875	2358	1829	405	1791	1500
	27	6	544	1645	866	1858	1913	1514	1514	2271
	28	11	1091	1641	2237	2072	1944	1607	3077	2456
	29	520	1772	2214	2334	3504	3280	3511	3231	3856
	30	713	1807	2203	2441	3714	3997	3353	3023	3589
	31	874	1806	2296	2367	3802	4092	3391	3091	3629
	32	915	1787	2340	2387	3751	3744	3370	3329	3347
	33	910	1799	2280	2409	3833	3835	3990	2965	3381
	34	1497	1787	2257	2404	3765	3715	3366	2987	3504
	35	1510	1773	2260	2611	3737	2965	3357	2949	3465
	36	2016	1776	2464	2687	3770	3606	3519	2956	3486
	37	2024	1764	2474	2592	3769	3802	3497	2956	3483
	38	2692	1764	3021	2639	3516	1898	3548	2601	2404
	39	2769	2105	2484	1381	3519	2805	2154	2967	3473
	40	2327	2094	2493	1398	3507	2792	2895	3096	3458
	41	3127	2082	2451	1383	3513	2051	3738	3049	3565
	42	294	0	2431	1388	3486	2481	3254	3036	3398
	43	853	3794	2338	66	3624	2698	3719	2931	3169
	44	1822	1897	2296	710	2322	2465	3668	2946	2853
	45	1845	1856	2284	1022	3540	1147	2683	2948	2595
	46	1322	221	907	891	2876	1127	1518	1569	1916
	47	188	169	896	451	570	871	924	1176	613
	48	182	178	921	312	348	310	354	1019	634
	49	462	1880	3026	194	402	344	339	2590	1820
	50	1252	1883	3030	48	3250	378	2607	2727	2008
	51	1300	1852	3120	792	600	744	3045	2929	2005
	52	1267	1858	3250	4361	572	2549	2871	3237	2003
	53		1863					3087
		47162	79482	108507	99355	154067	144281	144323	140048	143959		1061184

## Sheet: shifting three weeks
Week	Year	No Usable	Positive	Negative	No Response	Invited	Returned	% positive	% returned		Week	Year	No Usable	Positive	Negative	No Response	Invited	Returned	% positive	% returned		Week	Year	No Usable	Positive	Negative	No Response	Invited	Returned	% positive	% returned
50	2021	2	58	1601	1078	2739	1661	3.49187	60.6426		1	2021	6	105	2032	1445	3588	2143	4.89967	59.7269		1	2022	3	53	1205	1519	2780	1261	4.20301	45.3597
51	2021	3	62	1518	1334	2917	1583	3.91661	54.2681		2	2021	5	84	1704	1396	3189	1793	4.68489	56.2245		2	2022	4	55	1429	1339	2827	1488	3.69624	52.6353
52	2021	3	62	1208	1990	3263	1273	4.87038	39.0132		3	2021	3	53	948	772	1776	1004	5.27888	56.5315		3	2022	2	29	927	1276	2234	958	3.02714	42.8827
1	2022	3	53	1205	1519	2780	1261	4.20301	45.3597		4	2021	4	73	1495	969	2541	1572	4.64377	61.8654		4	2022	1	58	1258	1158	2475	1317	4.40395	53.2121
2	2022	4	55	1429	1339	2827	1488	3.69624	52.6353		5	2021	7	71	1380	1031	2489	1458	4.86968	58.5777		5	2022	11	58	1421	1325	2815	1490	3.89262	52.9307
3	2022	2	29	927	1276	2234	958	3.02714	42.8827		6	2021	3	104	1725	1515	3347	1832	5.67686	54.7356		6	2022	5	63	1510	1323	2901	1578	3.9924	54.395
4	2022	1	58	1258	1158	2475	1317	4.40395	53.2121		7	2021	2	93	1834	1284	3213	1929	4.82115	60.0373		7	2022	1	49	1578	1330	2958	1628	3.00983	55.0372
5	2022	11	58	1421	1325	2815	1490	3.89262	52.9307		8	2021	4	99	1845	1291	3239	1948	5.08214	60.142		8	2022	2	73	1782	1075	2932	1857	3.93107	63.3356
6	2022	5	63	1510	1323	2901	1578	3.9924	54.395		9	2021	5	81	1454	1065	2605	1540	5.25974	59.1171		9	2022	1	77	1667	1167	2912	1745	4.41261	59.9245
7	2022	1	49	1578	1330	2958	1628	3.00983	55.0372		10	2021	1	76	1414	833	2324	1491	5.09725	64.1566		10	2022	4	54	1674	1228	2960	1732	3.11778	58.5135
8	2022	2	73	1782	1075	2932	1857	3.93107	63.3356		11	2021	3	62	1114	1107	2286	1179	5.25869	51.5748		11	2022	3	71	1575	711	2360	1649	4.30564	69.8729
9	2022	1	77	1667	1167	2912	1745	4.41261	59.9245		12	2021	2	68	1529	846	2445	1599	4.25266	65.3988		12	2022	0	45	1400	801	2246	1445	3.11419	64.3366
10	2022	4	54	1674	1228	2960	1732	3.11778	58.5135		13	2021	3	81	1665	912	2661	1749	4.63122	65.7272		13	2022	5	46	1406	1457	2914	1457	3.15717	50
11	2022	3	71	1575	711	2360	1649	4.30564	69.8729		14	2021	1	98	1881	1301	3281	1980	4.94949	60.3475		14	2022	2	41	1478	1223	2744	1521	2.6956	55.43
12	2022	0	45	1400	801	2246	1445	3.11419	64.3366		15	2021	3	93	1792	1221	3109	1888	4.92585	60.7269		15	2022	3	52	1294	1400	2749	1349	3.85471	49.0724
13	2022	5	46	1406	1457	2914	1457	3.15717	50		16	2021	1	74	1594	1022	2691	1669	4.43379	62.0216		16	2022	3	75	1659	1254	2991	1737	4.31779	58.0742
14	2022	2	41	1478	1223	2744	1521	2.6956	55.43		17	2021	1	50	1300	755	2106	1351	3.70096	64.15		17	2022	2	79	1891	1333	3305	1972	4.00609	59.6672
15	2022	3	52	1294	1400	2749	1349	3.85471	49.0724		18	2021	3	65	1629	1281	2978	1697	3.83029	56.9846		18	2022	4	72	1972	1303	3351	2048	3.51562	61.1161
16	2022	3	75	1659	1254	2991	1737	4.31779	58.0742		19	2021	1	74	1742	1402	3219	1817	4.07265	56.4461		19	2022	2	86	2135	1219	3442	2223	3.86865	64.5845
17	2022	2	79	1891	1333	3305	1972	4.00609	59.6672		20	2021	1	64	1865	1099	3029	1930	3.31606	63.7174		20	2022	2	83	2070	1252	3407	2155	3.85151	63.2521
18	2022	4	72	1972	1303	3351	2048	3.51562	61.1161		21	2021	5	88	1864	1308	3265	1957	4.49668	59.9387		21	2022	2	81	1684	1482	3249	1767	4.58404	54.386
19	2022	2	86	2135	1219	3442	2223	3.86865	64.5845		22	2021	1	69	1373	1153	2596	1443	4.7817	55.5855		22	2022	2	54	1314	1072	2442	1370	3.94161	56.1016
20	2022	2	83	2070	1252	3407	2155	3.85151	63.2521		23	2021	3	59	1210	894	2166	1272	4.63836	58.7258		23	2022	0	41	1071	1313	2425	1112	3.68705	45.8557
21	2022	2	81	1684	1482	3249	1767	4.58404	54.386		24	2021	4	68	1061	697	1830	1133	6.00177	61.9126		24	2022	1	50	1304	1030	2385	1355	3.69004	56.8134
22	2022	2	54	1314	1072	2442	1370	3.94161	56.1016		25	2021	0	49	963	704	1716	1012	4.8419	58.9744		25	2022	2	54	1066	1188	2310	1122	4.81283	48.5714
23	2022	0	41	1071	1313	2425	1112	3.68705	45.8557		26	2021	1	41	1152	584	1778	1194	3.43384	67.1541		26	2022	1	17	756	714	1488	774	2.19638	52.0161
24	2022	1	50	1304	1030	2385	1355	3.69004	56.8134		27	2021	3	30	733	734	1500	766	3.91645	51.0667		27	2022	0	61	1176	1035	2272	1237	4.93129	54.4454
25	2022	2	54	1066	1188	2310	1122	4.81283	48.5714		28	2021	4	99	2037	919	3059	2140	4.62617	69.9575		28	2022	3	43	1230	1174	2450	1276	3.36991	52.0816
26	2022	1	17	756	714	1488	774	2.19638	52.0161		29	2021	3	95	1945	1157	3200	2043	4.65002	63.8438		29	2022	3	81	2039	1724	3847	2123	3.81536	55.1859
27	2022	0	61	1176	1035	2272	1237	4.93129	54.4454		30	2021	3	91	1862	1021	2977	1956	4.65235	65.7037		30	2022	3	74	2004	1506	3587	2081	3.55598	58.0151
28	2022	3	43	1230	1174	2450	1276	3.36991	52.0816		31	2021	1	87	1608	1406	3102	1696	5.12972	54.6744		31	2022	1	91	1959	1583	3634	2051	4.43686	56.4392
29	2022	3	81	2039	1724	3847	2123	3.81536	55.1859		32	2021	4	77	1518	1747	3346	1599	4.81551	47.7884		32	2022	4	87	1987	1278	3356	2078	4.18672	61.919
30	2022	3	74	2004	1506	3587	2081	3.55598	58.0151		33	2021	5	70	1341	1540	2956	1416	4.9435	47.9026		33	2022	4	80	1926	1361	3371	2010	3.9801	59.6262
31	2022	1	91	1959	1583	3634	2051	4.43686	56.4392		34	2021	3	68	1566	1352	2989	1637	4.15394	54.7675		34	2022	0	83	2304	1119	3506	2387	3.47717	68.0833
32	2022	4	87	1987	1278	3356	2078	4.18672	61.919		35	2021	1	86	1486	1388	2961	1573	5.46726	53.1239		35	2022	1	77	2175	1208	3461	2253	3.41767	65.0968
33	2022	4	80	1926	1361	3371	2010	3.9801	59.6262		36	2021	2	95	1722	1146	2965	1819	5.22265	61.3491		36	2022	1	79	1974	1436	3490	2054	3.84615	58.8539
34	2022	0	83	2304	1119	3506	2387	3.47717	68.0833		37	2021	2	111	1927	926	2966	2040	5.44118	68.7795		37	2022	1	80	1854	1558	3493	1935	4.13437	55.3965
35	2022	1	77	2175	1208	3461	2253	3.41767	65.0968		38	2021	3	78	1811	720	2612	1892	4.12262	72.4349		38	2022	3	53	1500	855	2411	1556	3.40617	64.5375
36	2022	1	79	1974	1436	3490	2054	3.84615	58.8539		39	2021	3	86	1783	1111	2983	1872	4.59402	62.7556		39	2022	3	98	2075	1295	3471	2176	4.50368	62.6909
37	2022	1	80	1854	1558	3493	1935	4.13437	55.3965		40	2021	3	95	1819	1174	3091	1917	4.95566	62.0188		40	2022	2	80	2309	1066	3457	2391	3.34588	69.164
38	2022	3	53	1500	855	2411	1556	3.40617	64.5375		41	2021	2	73	1699	1274	3048	1774	4.11499	58.2021		41	2022	2	110	2470	979	3561	2582	4.26026	72.5077
39	2022	3	98	2075	1295	3471	2176	4.50368	62.6909		42	2021	1	69	1613	1363	3046	1683	4.09982	55.2528		42	2022	1	73	1908	1410	3392	1982	3.68315	58.4316
40	2022	2	80	2309	1066	3457	2391	3.34588	69.164		43	2021	5	75	1679	1183	2942	1759	4.26379	59.7893		43	2022	1	57	1521	1594	3173	1579	3.60988	49.7636
41	2022	2	110	2470	979	3561	2582	4.26026	72.5077		44	2021	2	64	1598	1282	2946	1664	3.84615	56.4834		44	2022	3	43	910	1904	2860	956	4.49791	33.4266
42	2022	1	73	1908	1410	3392	1982	3.68315	58.4316		45	2021	6	58	1443	1446	2953	1507	3.84871	51.0328		45	2022	3	53	992	1552	2600	1048	5.05725	40.3077
43	2022	1	57	1521	1594	3173	1579	3.60988	49.7636		46	2021	2	35	689	862	1588	726	4.82094	45.7179		46	2022	2	41	775	1096	1914	818	5.01222	42.7377
44	2022	3	43	910	1904	2860	956	4.49791	33.4266		47	2021	3	38	729	428	1198	770	4.93506	64.2738		47	2022	2	11	301	304	618	314	3.50318	50.8091
45	2022	3	53	992	1552	2600	1048	5.05725	40.3077		48	2021	2	26	576	442	1046	604	4.30464	57.7438		48	2022	1	22	372	248	643	395	5.56962	61.4308
46	2022	2	41	775	1096	1914	818	5.01222	42.7377		49	2021	2	49	1467	1068	2586	1518	3.22793	58.7007		49	2022	4	34	1017	772	1827	1055	3.22275	57.7449
47	2022	2	11	301	304	618	314	3.50318	50.8091		50	2021	2	58	1601	1078	2739	1661	3.49187	60.6426		50	2022	1	32	685	927	1645	718	4.45682	43.6474
48	2022	1	22	372	248	643	395	5.56962	61.4308		51	2021	3	62	1518	1334	2917	1583	3.91661	54.2681		51	2022	2	67	1623	783	2475	1692	3.95981	68.3636
49	2022	4	34	1017	772	1827	1055	3.22275	57.7449		52	2021	3	62	1208	1990	3263	1273	4.87038	39.0132		52	2022	2	49	1311	1120	2482	1362	3.59765	54.8751
50	2022	1	32	685	927	1645	718	4.45682	43.6474
51	2022	2	67	1623	783	2475	1692	3.95981	68.3636	Not included
52	2022	2	49	1311	1120	2482	1362	3.59765	54.8751
		121	3175	78923	62379	144598	82219	3.86164	56.8604				146	3779	78543	57978	140446	82468	4.58238	58.7187
