# Supplementary material for: Investigating the putative unforeseen link between football fervour and colorectal cancer screening in Denmark
Source: PeerJ journal article supplement (doi:10.7717/peerj.18057), 2024-09-26
Supplement: SupplementalTable_1.pdf [file SupplementalTable_1.pdf]

**Table 1 | Timetable for invitations to the colorectal screening program autumn 2022**

| Generation of invitations<br>(week) | Invitation in citizen's<br>mailbox late week | Expected 50% response<br>by weeks | Relevant Football World Cup 2022<br>dates           |
|-------------------------------------|----------------------------------------------|-----------------------------------|-----------------------------------------------------|
| 24 Oct (43)                         | 44                                           | 45 - 47                           | Preinauguration of World Cup 20 Nov                 |
| <b>31 Oct (44)</b>                  | <b>45</b>                                    | <b>46 - 48</b>                    | <b>Opening, and Danish matches on 22 and 26 Nov</b> |
| <b>07 Nov (45)</b>                  | <b>46</b>                                    | <b>47 - 49</b>                    | <b>Danish match on 30th Nov</b>                     |
| 14 Nov (46)                         | 47                                           | 48 - 50                           | Quater finals 9 and 10 Dec                          |
| 21 Nov (47)                         | 48                                           | 49 - 51                           | Semi finals 13 and 14 Dec                           |
| 28 Nov (48)                         | 49                                           | 50 - 52                           | World Cup Final 18 Dec                              |
